# Supplementary material for: Role of oxygen functional groups and attachment of Au nanoparticles on graphene oxide sheets for improved photodetection performance
Source: Royal Society of Chemistry journal article supplement (doi:10.1039/d3na01120h), 2024-01-01
Supplement: d3na01120h1.pdf [file d3na01120h1.pdf]

## Role of Oxygen Functional Groups and Attachment of Au Nanoparticles on Graphene Oxide Sheets For Improved Photodetection Performance

<sup>1</sup>Ningthoujam Somorjit Singh, <sup>1</sup>Abdul Kaium Mia, <sup>1,2</sup>P. K. Giri\*

<sup>1</sup>Centre for Nanotechnology, Indian Institute of Technology Guwahati, Guwahati, India.

<sup>2</sup>Department of Physics, Indian Institute of Technology Guwahati, Guwahati, India.

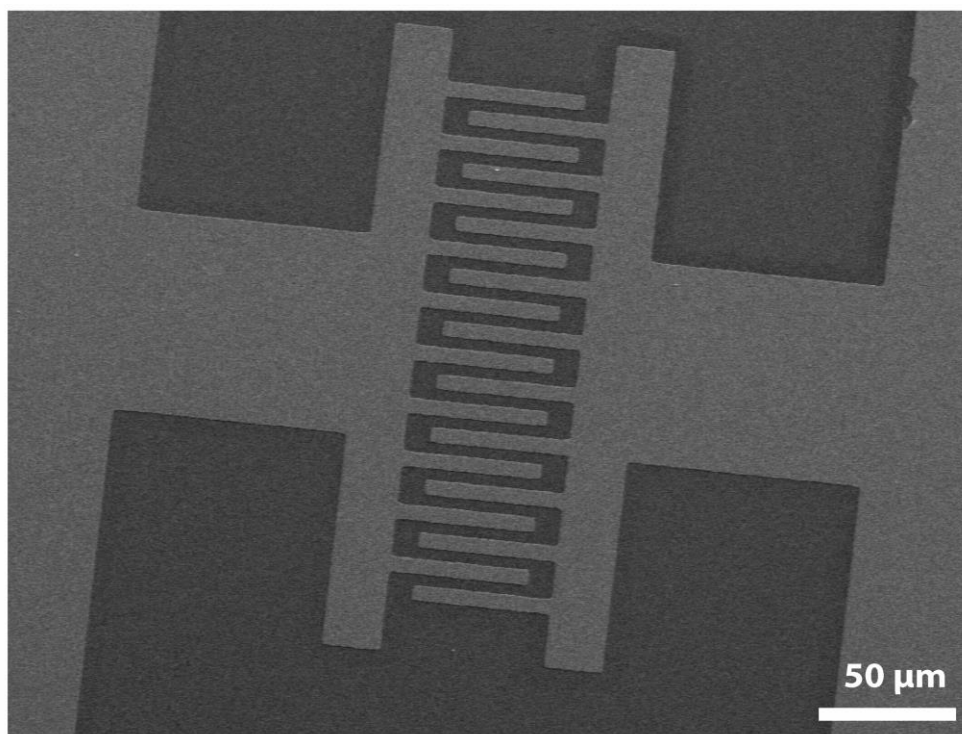

**Fig. S1:** Inter digitated electrode (IDE) patterned on the substrate.

---

\*Corresponding Author, Email ID: [giri@iitg.ac.in](mailto:giri@iitg.ac.in)

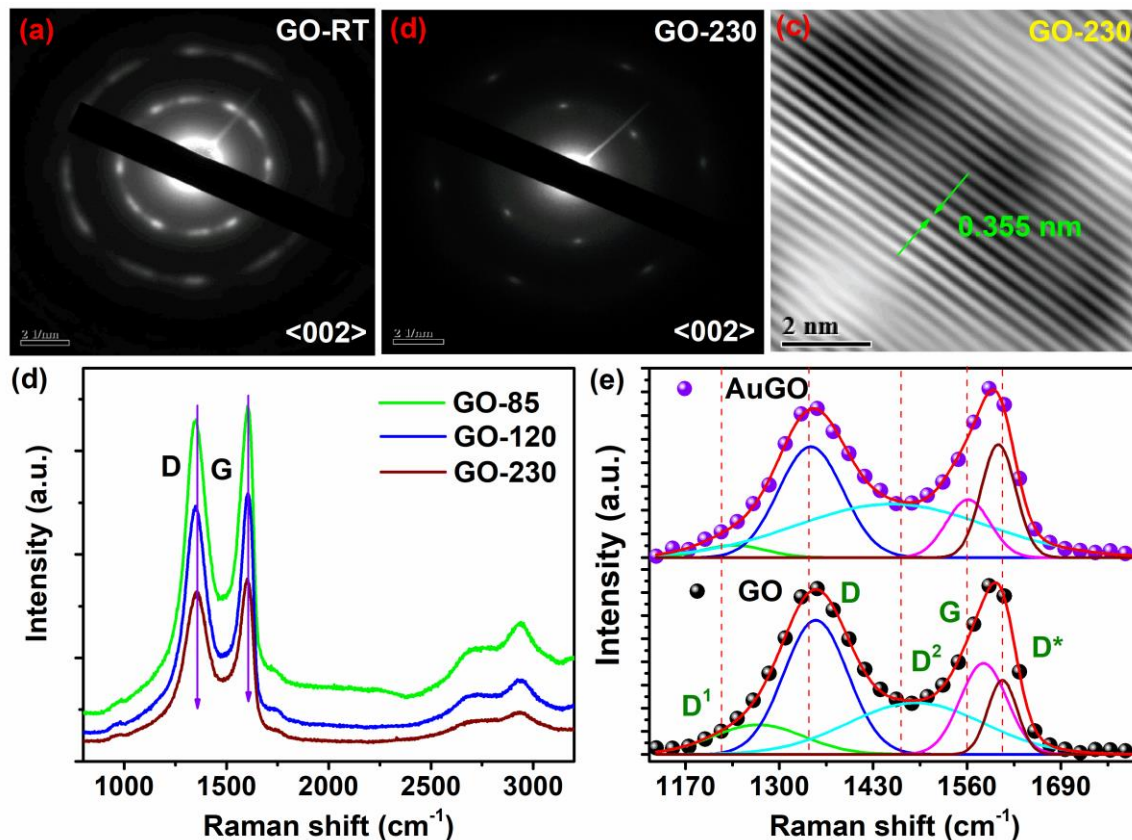

**Fig. S2:** SAED pattern for (a) GO-RT and (b) GO-230, (c) IFFT analysis of GO-230, (d) the Raman spectra of GO annealed at various temperatures, and (e) the deconvolution of the D and G bands by Gaussian peaks for GO-RT and AuGO.

**Table S1:** Deconvolution of the D and G band by five Gaussian peaks on both the GO and AuGO

| Deconvoluted peaks | Peak position of GO (cm <sup>-1</sup> ) | Peak positions of AuGO (cm <sup>-1</sup> ) | Shift of peak positions from GO peak (cm <sup>-1</sup> ) |
|--------------------|-----------------------------------------|--------------------------------------------|----------------------------------------------------------|
| D <sup>1</sup>     | 1257                                    | 1246                                       | 11                                                       |
| D                  | 1350                                    | 1343                                       | 7                                                        |
| D <sup>2</sup>     | 1488                                    | 1465                                       | 23                                                       |
| G                  | 1582                                    | 1571                                       | 11                                                       |
| D*                 | 1609                                    | 1603                                       | 6                                                        |

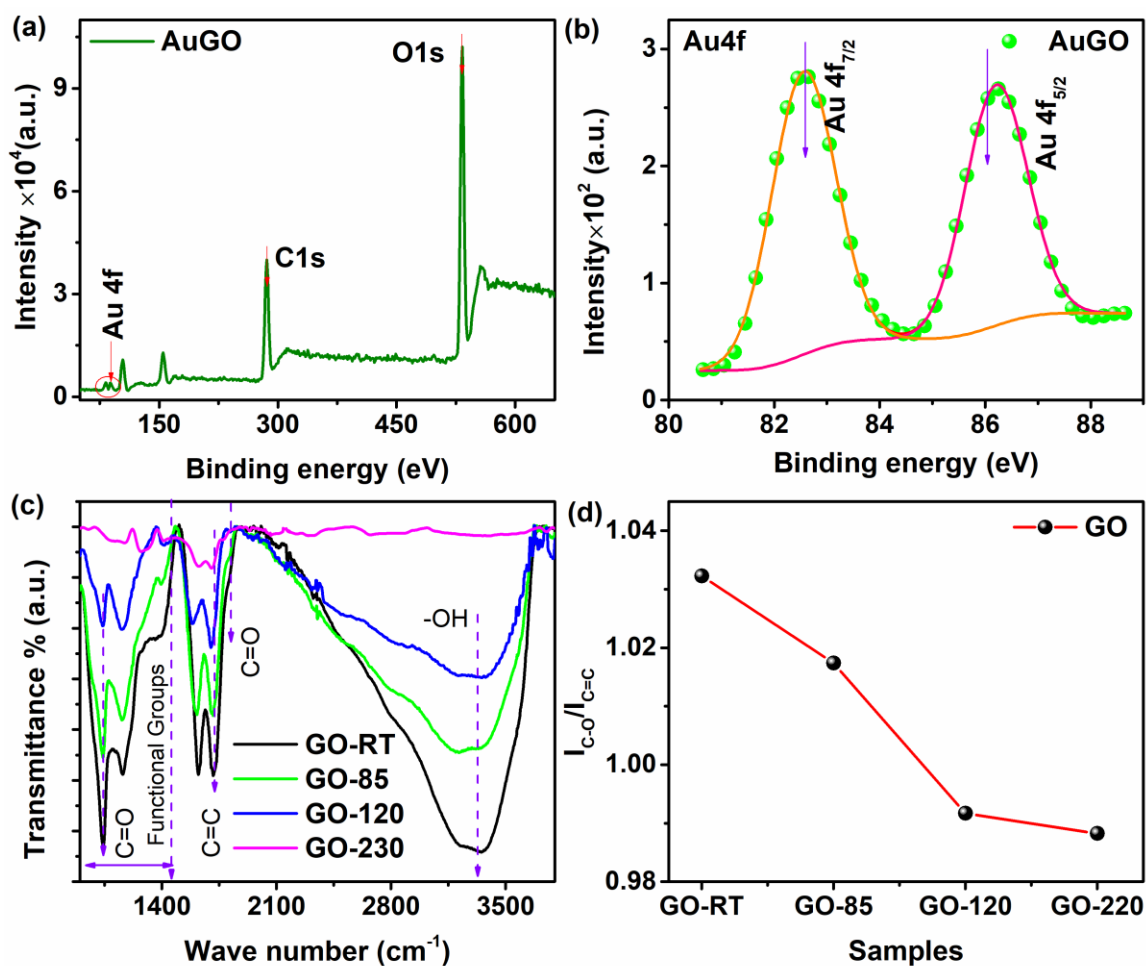

**Fig. S3:** (a) The survey spectrum of XPS analysis for AuGO, (b) deconvoluted XPS spectra for Au4f. (c) FTIR spectra of GO before and after annealing, and (d) the intensity ( $I_{C=O}/I_{C=C}$ ) ratio C-O and C=C peak of GO samples annealed at different temperatures.

**Table S2:** Spectral weight of the different temperature annealed GO samples.

| Samples | Annealing Temperature (°C) | Spectral weight (%) |       |       |       |       |
|---------|----------------------------|---------------------|-------|-------|-------|-------|
|         |                            | C=C                 | C-C   | C-O   | C=O   | O-C-O |
| GO-RT   | RT                         | 20.72               | 21.28 | 20.08 | 23.59 | 14.33 |
| GO-85   | 85                         | 39.8                | 20.69 | 13.98 | 14.27 | 11.26 |
| GO-230  | 230                        | 57.27               | 20.69 | 12.66 | 9.38  | --    |

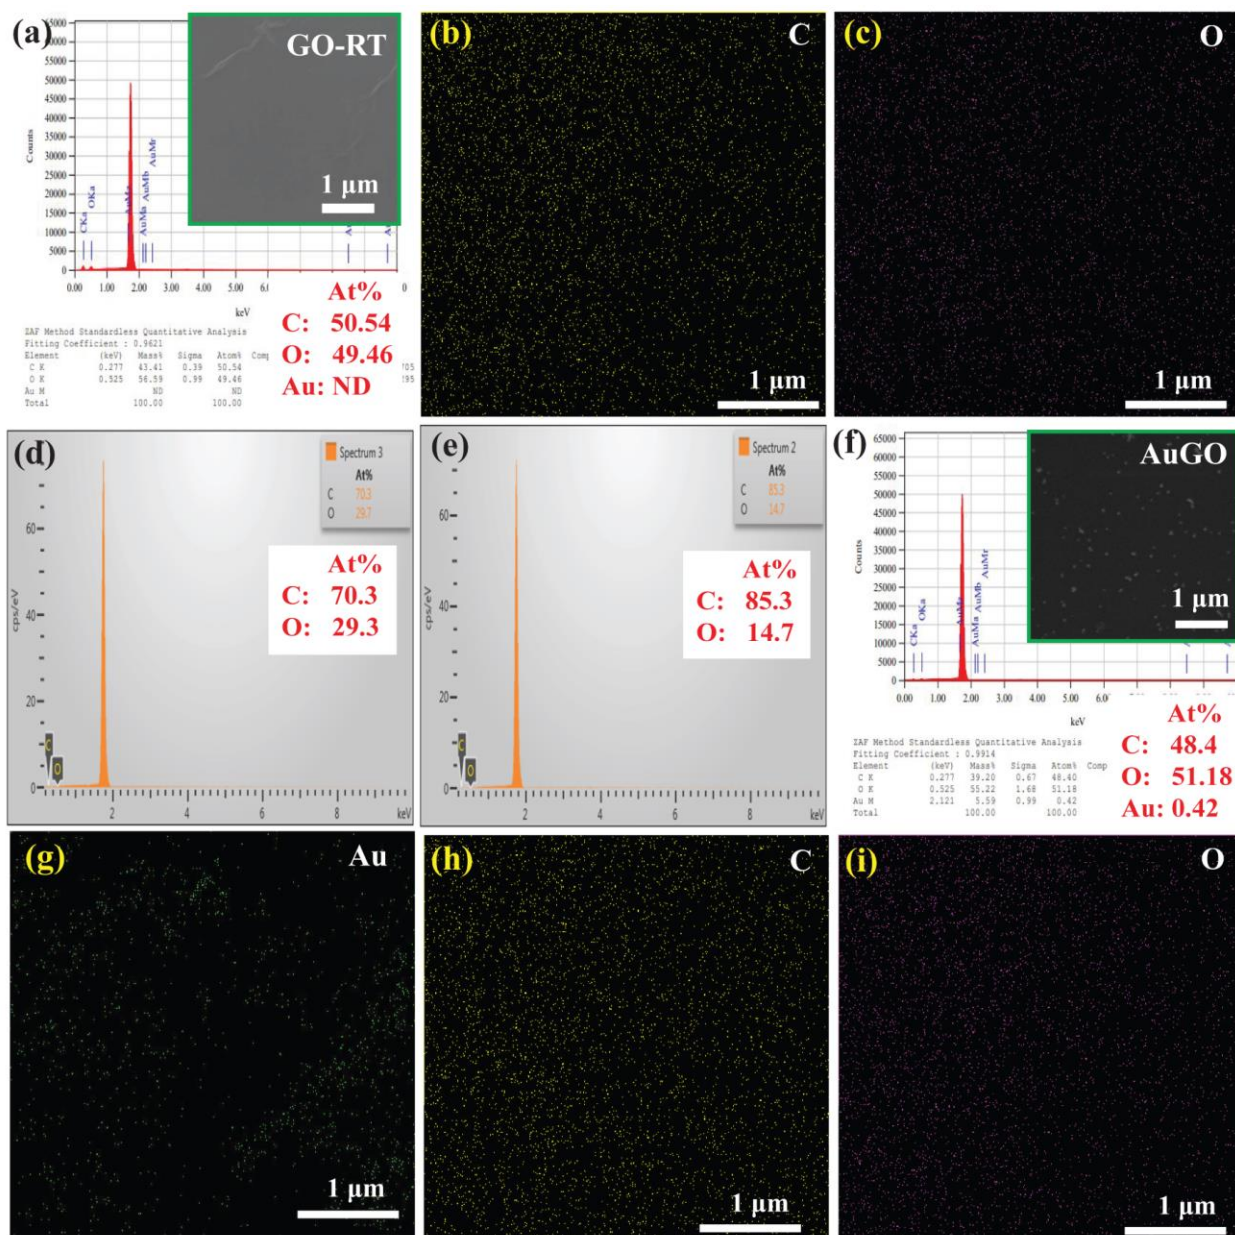

**Fig. S4:** (a) EDS analysis on GO-RT and performing elemental mapping for (b) C, and (c) O in GO-RT. Analyzing (d) GO-85, (e) GO-230, and (f) AuGO through EDS. The elemental mapping for (g) Au, (h) C, and (i) O in AuGO.

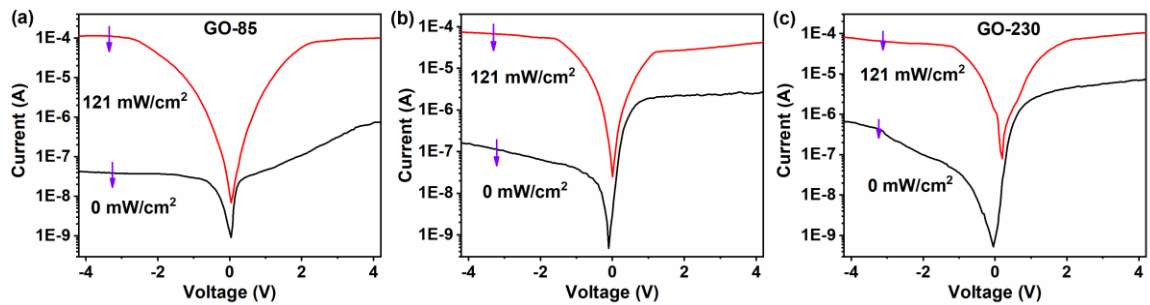

**Fig. S5:** Logarithmic I-V characteristics of (a) GO-85, (b) GO-120, and (c) GO-230 in dark and under light illumination.



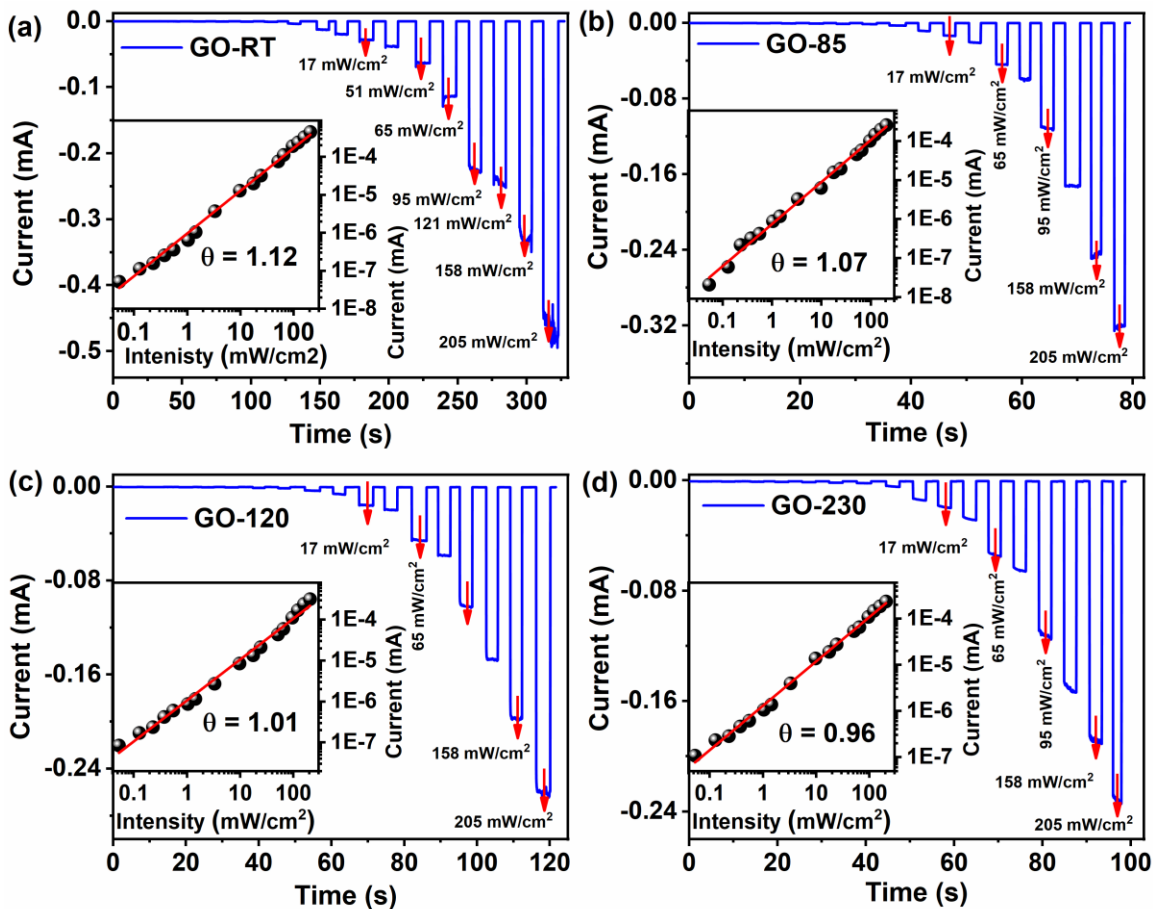

**Fig. S6:** Photocurrent response of the (a) GO-RT, (b) GO-85, (c) GO-120, and (d) GO-230 for different excitation powers. The inset in each case shows the logarithmic plot of photocurrent vs. light intensity (mW/cm<sup>2</sup>) to determine the slope ( $\theta$ ).

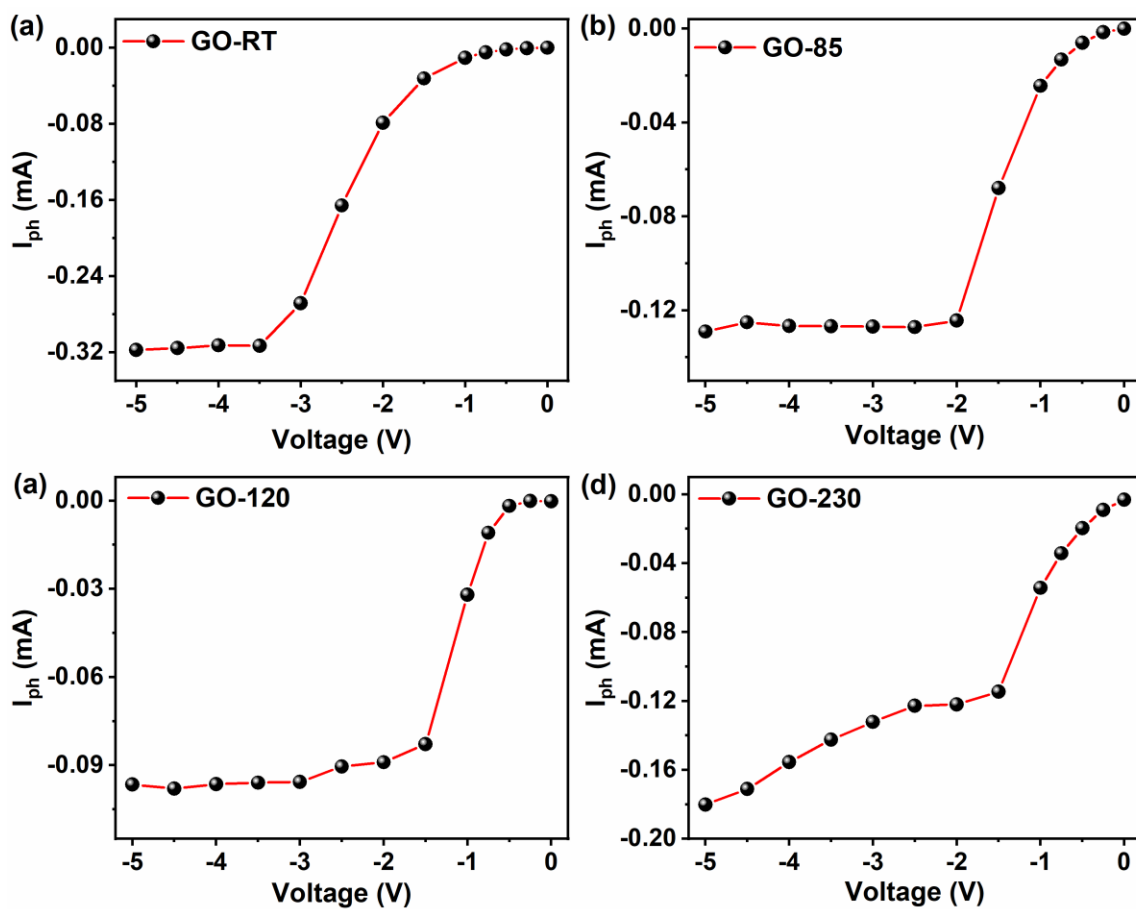

**Fig. S7:** Photocurrent ( $I_{ph}$ ) as a function of bias voltage for (a) GO-RT, (b) GO-85, (c) GO-120, and (d) GO-230.

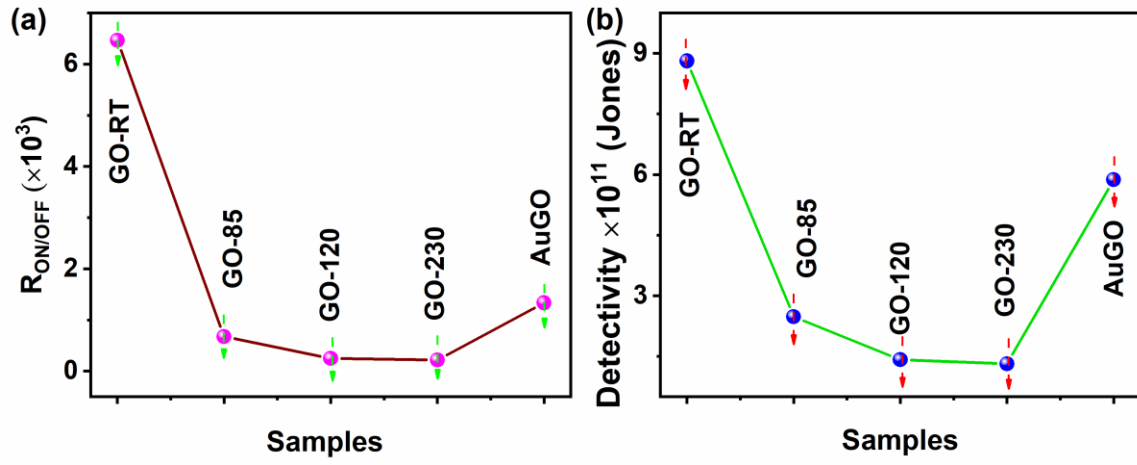

**Fig. S8:** A comparison of on/off current ratio ( $R_{ON/OFF}$ ) and detectivity ( $D$ ) for the GO-RT, GO-85, GO-120, GO-230, and AuGO.
